# Supplementary material for: Prediction of the reliability of genomic breeding values for crossbred performance
Source: PubMed Central journal article supplement (PMC5439167; doi:10.1186/s12711-017-0318-1), 2017-05-12
Supplement: 12711_2017_318_MOESM1_ESM.pdf [file 12711_2017_318_MOESM1_ESM.pdf]

## **Additional file 1: Derivation of the equation for predicting the reliability of genomic estimated breeding values without availability of data.**

Based on the mixed model theory, a derivation of the equation for predicting the reliability of genomic estimated breeding values is detailed hereafter, assuming that effects of all independent loci are estimated simultaneously, and assuming a single population. Consider  $N$  unrelated reference animals genotyped for  $Me$  independent loci and associated with one record. It is assumed that the effect  $\beta_k^*$  of each  $k^{\text{th}}$  independent locus explains an equal amount of the additive genetic variance  $\sigma_a^2$ , i.e.  $\sigma_a^2 = Me\sigma_{\beta^*}^2$  with  $\sigma_{\beta^*}^2$  being the variance at one locus. It is also assumed that reliability of the estimated effect is the same for each locus ( $r_{\beta^*}^2$ ). The matrix  $\mathbf{Z}^*$  contains the standardized genotypes as  $\mathbf{Z}_{lk}^* = \frac{\mathbf{M}_{lk} - 2p_k}{\sqrt{2p_k(1-p_k)}}$  with  $\mathbf{M}_{lk}$  being the genotype (coded as 0 for homozygous genotypes, 1 for heterozygous genotypes, or 2 for alternate homozygous genotypes) of the  $l^{\text{th}}$  individual for the  $k^{\text{th}}$  locus, and  $p_k$  being the allele frequency of the  $k^{\text{th}}$  locus.

The genomic breeding value ( $a_i$ ) for the  $i^{\text{th}}$  selection candidate can be predicted as:

$$\hat{a}_i = \mathbf{z}_i^* \widehat{\boldsymbol{\beta}^*},$$

where  $\mathbf{z}_i^*$  is a row vector for the  $Me$  independent loci of the  $i^{\text{th}}$  selection candidate, and the vector  $\widehat{\boldsymbol{\beta}^*}$  is the vector of the predictions of  $\boldsymbol{\beta}^*$ .

Following the mixed model theory [17, 19], the reliability of  $\hat{a}_i$ ,  $r_{a_i}^2$ , is equal to:

$$r_{a_i}^2 = 1 - \frac{\text{Var}(\hat{a}_i - a_i)}{\text{Var}(a_i)} = \frac{\text{Var}(\hat{a}_i)}{\text{Var}(a_i)} = \frac{\text{Var}(\mathbf{z}_i^* \widehat{\boldsymbol{\beta}^*})}{\text{Var}(\mathbf{z}_i^* \boldsymbol{\beta}^*)}$$

$$= \frac{\mathbf{z}_i^* \text{Var}(\widehat{\boldsymbol{\beta}^*}) \mathbf{z}_i^{*'}}{\mathbf{z}_i^* \text{Var}(\boldsymbol{\beta}^*) \mathbf{z}_i^{*'}} = \frac{\text{Var}(\widehat{\beta}_k^*)}{\text{Var}(\beta_k^*)}$$

$$= \frac{\text{Var}(\beta_k^*) - \text{Var}(\beta_k^* - \widehat{\beta}_k^*)}{\text{Var}(\beta_k^*)} = r_{\beta^*}^2,$$

because it was assumed that the effect  $\beta_k^*$  of each  $k^{\text{th}}$  independent locus explains an equal amount of the additive genetic variance, and that the reliability of the predicted effect,  $r_{\beta^*}^2$ , is the same for each locus.

The reliability  $r_{\beta^*}^2$  can be approximated as follows. The prediction of  $\beta_k^*$  for the  $k^{\text{th}}$  locus can be performed from the phenotypes,  $\mathbf{y}$ , corrected for all other fixed and random effects (e.g.,  $\widehat{\beta}_{\neq k}^*$ ),  $\widehat{\mathbf{y}}$ , using the model:

$$\widehat{\mathbf{y}} = \mathbf{y} - \mathbf{Z}_{\neq k}^* \widehat{\beta}_{\neq k}^* =$$

$$\mathbf{z}_k^* \beta_k^* + \mathbf{Z}_{\neq k}^* \beta_{\neq k}^* + \mathbf{e} - \mathbf{Z}_{\neq k}^* \widehat{\beta}_{\neq k}^* = \mathbf{z}_k^* \beta_k^* + \boldsymbol{\varepsilon}_k,$$

with  $\mathbf{Z}^* = [\mathbf{z}_k^* \quad \mathbf{Z}_{\neq k}^*]$ ,  $\boldsymbol{\beta}' = [\beta_k^* \quad \beta_{\neq k}^*]$ , and  $\boldsymbol{\varepsilon}_k$  is a residual vector.

It follows that  $\boldsymbol{\varepsilon}_k = \mathbf{Z}_{\neq k}^* \beta_{\neq k}^* - \mathbf{Z}_{\neq k}^* \widehat{\beta}_{\neq k}^* + \mathbf{e}$ . The variance of  $\mathbf{y}$  is equal to  $\text{Var}(\mathbf{y}) =$

$\text{Var}(\mathbf{z}_k^* \beta_k^* + \mathbf{Z}_{\neq k}^* \beta_{\neq k}^* + \mathbf{e}) = \mathbf{z}_k^* \mathbf{z}_k^{*'} \sigma_{\beta^*}^2 + \text{Var}(\mathbf{Z}_{\neq k}^* \beta_{\neq k}^*) + \text{Var}(\mathbf{e})$ , and similarly, the variance

of  $\widehat{\mathbf{y}}$  is equal to  $\text{Var}(\widehat{\mathbf{y}}) = \mathbf{z}_k^* \mathbf{z}_k^{*'} \sigma_{\beta^*}^2 + \text{Var}(\boldsymbol{\varepsilon}_k)$ . The variance of  $\boldsymbol{\varepsilon}_k$  is unknown and can be

derived as follows:

$$\text{Var}(\boldsymbol{\varepsilon}_k) = \text{Var}(\mathbf{Z}_{\neq k}^* \beta_{\neq k}^* - \mathbf{Z}_{\neq k}^* \widehat{\beta}_{\neq k}^* + \mathbf{e})$$

$$= \mathbf{Z}_{\neq k}^* \mathbf{Z}_{\neq k}^{*'} \text{Var}(\beta_{\neq k}^* - \widehat{\beta}_{\neq k}^*) + \text{Var}(\mathbf{e})$$

$$= \mathbf{Z}_{\neq k}^* \mathbf{Z}_{\neq k}^{*'} \sigma_{\beta^*}^2 (1 - r_{\beta^*}^2) + \mathbf{I} \sigma_e^2$$

$$\approx \mathbf{I} (\sigma_a^2 (1 - r_{\beta^*}^2) + \sigma_e^2) = \mathbf{I} \sigma_{\varepsilon}^2,$$

where  $\sigma_e^2$  is the residual variance; null covariances between random effects are assumed due to independent loci; and  $Cov(\mathbf{Z}_{\neq k}^* \widehat{\boldsymbol{\beta}}_{\neq k}^*, \mathbf{e}) = \mathbf{0}$ .

The approximation  $\mathbf{Z}_{\neq k}^* \mathbf{Z}_{\neq k}^{*'} \sigma_{\beta^*}^2 \approx \mathbf{I} \sigma_a^2$  is performed because unrelated animals were assumed and because a single independent locus explains a small amount of  $\sigma_a^2$ .

It is worth noting that  $\sigma_\varepsilon^2 = \sigma_a^2(1 - r_{\beta^*}^2) + \sigma_e^2$  is equivalent to the correction developed by Daetwyler et al. [12] in their Appendix, assuming that the phenotypic variance  $\sigma_p^2 = 1$ .

Therefore, the prediction of  $\beta_k^*$ ,  $\widehat{\beta}_k^*$ , is equal to, following the mixed model theory [17]:

$$\widehat{\beta}_k^* = (\mathbf{z}_k^{*'} \mathbf{z}_k^* \sigma_\varepsilon^{-2} + \sigma_{\beta^*}^{-2})^{-1} \sigma_\varepsilon^{-2} \mathbf{z}_k^{*'} \hat{\mathbf{y}},$$

and, the reliability of  $\widehat{\beta}_k^*$  is equal to:

$$\begin{aligned} r_{\beta^*}^2 &= \frac{Var(\beta_k^*) - Var(\widehat{\beta}_k^* - \beta_k^*)}{Var(\beta_k^*)} \\ &= \frac{\sigma_{\beta^*}^2 - (\mathbf{z}_k^{*'} \mathbf{z}_k^* \sigma_\varepsilon^{-2} + \sigma_{\beta^*}^{-2})^{-1}}{\sigma_{\beta^*}^2} \\ &= \frac{\sigma_{\beta^*}^2 - (S_{zz,k} \sigma_\varepsilon^{-2} + \sigma_{\beta^*}^{-2})^{-1}}{\sigma_{\beta^*}^2} \\ &= \frac{\sigma_{\beta^*}^2 - (N \sigma_\varepsilon^{-2} + \sigma_{\beta^*}^{-2})^{-1}}{\sigma_{\beta^*}^2} \\ &= \frac{(N \sigma_\varepsilon^{-2} + \sigma_{\beta^*}^{-2}) \sigma_{\beta^*}^2 - 1}{(N \sigma_\varepsilon^{-2} + \sigma_{\beta^*}^{-2}) \sigma_{\beta^*}^2} = \frac{N \sigma_{\beta^*}^2}{N \sigma_{\beta^*}^2 + \sigma_e^2}, \end{aligned}$$

with  $S_{zz,k} = N$  being the adjusted sum of squares for the  $k^{\text{th}}$  locus [12, 14].

Because  $r_{a_i}^2 = r_{\beta^*}^2$ ,  $\sigma_a^2 = M_e \sigma_{\beta^*}^2$ , and  $\sigma_\varepsilon^2 = (\sigma_a^2(1 - r_{\beta^*}^2) + \sigma_e^2)$ , the reliability of  $\hat{a}_i$ ,  $r_{a_i}^2$ , is equal to:

$$r_{a_i}^2 = r_{\beta^*}^2 = \frac{N\sigma_{\beta^*}^2}{N\sigma_{\beta^*}^2 + \sigma_\varepsilon^2}$$

$$= \frac{N\sigma_a^2}{N\sigma_a^2 + M_e(\sigma_a^2(1 - r_{a_i}^2) + \sigma_e^2)} = \frac{Nh_a^2}{Nh_a^2 + M_e(1 - h_a^2 r_{a_i}^2)}.$$

The equation for  $r_{a_i}^2 = \frac{Nh_a^2}{Nh_a^2 + M_e(1 - h_a^2 r_{a_i}^2)}$  is equivalent to the equation developed by Daetwyler et al. [12] in the Appendix of their paper. However, similarly to these authors, and because  $h^2$  is considered as small for most traits of interest, the prediction equation reported in the main text of Daetwyler et al. [12] will be used in the main text of this manuscript, i.e.  $r_{a_i}^2 = \frac{Nh_a^2}{Nh_a^2 + M_e}$ .

As explained by Daetwyler et al. [12], this approximation has the consequence that the predicted reliabilities are slightly underestimated.
