# Supplementary material for: Prediction of the reliability of genomic breeding values for crossbred performance
Source: PubMed Central journal article supplement (PMC5439167; doi:10.1186/s12711-017-0318-1), 2017-05-12
Supplement: 12711_2017_318_MOESM2_ESM.pdf [file 12711_2017_318_MOESM2_ESM.pdf]

**Additional file 2: Derivation of the prediction equation without availability of data, using a breed-specific allele substitution effects model and only crossbred reference animals.**

The derivation of the equation that predicts the reliability of genomic estimated breeding values for crossbred performance using a breed-specific allele substitution effects model and only crossbred animals without availability of genotyping data,  $r_{C\_BSAM\_without}^2$ , is hereafter detailed. Consider  $N_{AB}$  unrelated crossbred AB reference animals. It is assumed that the breed-specific effect  $\beta_{c_k}^{*(A)}$  ( $\beta_{c_k}^{*(B)}$ ) of each  $k^{\text{th}}$  independent locus explains an equal amount of the breed-specific additive genetic variance  $\sigma_{c_A}^2$  ( $\sigma_{c_B}^2$ ), i.e.  $\sigma_{c_A}^2 = Me^{(A)}\sigma_{\beta_c^{*(A)}}^2$  ( $\sigma_{c_B}^2 = Me^{(B)}\sigma_{\beta_c^{*(B)}}^2$ ) with  $Me^{(A)}$  ( $Me^{(B)}$ ) being the effective number of chromosome segments underlying the crossbred performance trait for the breed A (B). The breed-specific effects  $\beta_c^{*(A)}$  and  $\beta_c^{*(B)}$  are assumed to be independent, i.e.,  $Cov(\beta_c^{*(A)}, \beta_c^{*(B)}) = \mathbf{0}$ , and the expectations of  $\beta_c^{*(A)}$  and  $\beta_c^{*(B)}$  are defined as  $E \begin{bmatrix} \beta_c^{*(A)} \\ \beta_c^{*(B)} \end{bmatrix} = \begin{bmatrix} \mathbf{0} \\ \mathbf{0} \end{bmatrix}$ . The entries of the matrix  $\mathbf{Z}_{AB}^{*(A)}$  are defined as  $\mathbf{Z}_{ABlk}^{*(A)} = \frac{\mathbf{M}_{lk} - p_{Ak}}{\sqrt{2p_{Ak}(1-p_{Ak})}}$  where the element  $\mathbf{M}_{lk}$  is set to 0 or 1 if the  $k^{\text{th}}$  locus of the  $l^{\text{th}}$  individual has the breed A allele 1 or 2, respectively, and  $p_{Ak}$  is the breed A specific allele frequency at the  $k^{\text{th}}$  locus. The matrix  $\mathbf{Z}_{AB}^{*(B)}$  is defined similarly.

The genomic breeding value ( $c_{a_i}^{(A)}$ ) for the  $i^{\text{th}}$  selection candidate of breed A can be predicted as follows:

$$\hat{c}_{a_i}^{(A)} = \mathbf{z}_{a_i}^{*(A)} \hat{\beta}_c^{*(A)},$$

where  $\mathbf{z}_{a_i}^{*(A)}$  is a row vector of the standardized genotypes for the  $Me^{(A)}$  independent loci of the  $i^{\text{th}}$  selection candidate of breed A; and the vector  $\hat{\beta}_c^{*(A)}$  is the vector of the predictions of

$$\beta_c^{*(A)}.$$

Following the mixed model theory [17, 19], the reliability of  $\hat{c}_{a_i}^{(A)}$ ,  $r_{c_{a_i}}^2$ , is equal to:

$$\begin{aligned} r_{c_{a_i}}^2 &= \frac{\text{Var}(\hat{c}_{a_i}^{(A)})}{\text{Var}(c_{a_i}^{(A)})} = \frac{\text{Var}(\mathbf{z}_{a_i}^{*(A)} \hat{\beta}_c^{*(A)})}{\text{Var}(\mathbf{z}_{a_i}^{*(A)} \beta_c^{*(A)})} \\ &= \frac{\mathbf{z}_{a_i}^{*(A)} \text{Var}(\hat{\beta}_c^{*(A)}) \mathbf{z}_{a_i}^{*(A)'} }{\mathbf{z}_{a_i}^{*(A)} \text{Var}(\beta_c^{*(A)}) \mathbf{z}_{a_i}^{*(A)'} } = \frac{\text{Var}(\hat{\beta}_{c_k}^{*(A)})}{\text{Var}(\beta_{c_k}^{*(A)})} = r_{\beta_c}^2, \end{aligned}$$

because it is assumed that the allele substitution effect  $\beta_{c_k}^{*(A)}$  of each  $k^{\text{th}}$  independent locus explains an equal amount of the breed A specific additive genetic variance  $\sigma_{c_A}^2$ , and that the accuracy of the estimated effect,  $r_{\beta_c}^2$ , is the same for each locus.

The reliability  $r_{\beta_c}^2$  can be approximated as follows. The prediction of  $\beta_{c_k}^{*(A)}$  for the  $k^{\text{th}}$  locus can be performed from the phenotypes,  $\mathbf{y}_{AB}$ , corrected for all other fixed effects, for the breed A specific effects other than the  $k^{\text{th}}$  effect,  $\hat{\beta}_{c_{\neq k}}^{*(A)}$ , as well as for the breed B specific effects,  $\hat{\beta}_c^{*(B)}$ , using the model:

$$\begin{aligned} \hat{\mathbf{y}}_{AB}^* &= \mathbf{y}_{AB} - \mathbf{Z}_{AB \neq k}^{*(A)} \hat{\beta}_{c_{\neq k}}^{*(A)} - \mathbf{Z}_{AB}^{*(B)} \hat{\beta}_c^{*(B)} \\ &= \mathbf{z}_{AB_k}^{*(A)} \beta_{c_k}^{*(A)} + \mathbf{Z}_{AB \neq k}^{*(A)} \beta_{c_{\neq k}}^{*(A)} + \mathbf{Z}_{AB}^{*(B)} \beta_c^{*(B)} \\ &+ \mathbf{e}_{AB} - \mathbf{Z}_{AB \neq k}^{*(A)} \hat{\beta}_{c_{\neq k}}^{*(A)} - \mathbf{Z}_{AB}^{*(B)} \hat{\beta}_c^{*(B)} = \mathbf{z}_{AB_k}^{*(A)} \beta_{c_k}^{*(A)} + \boldsymbol{\varepsilon}_{AB_k}, \end{aligned}$$

where  $\mathbf{Z}_{AB}^{*(A)} = [\mathbf{z}_{AB_k}^{*(A)} \quad \mathbf{Z}_{AB \neq k}^{*(A)}]$ ; and  $\boldsymbol{\varepsilon}_{AB_k}$  is the residual vector.

The variance of  $\mathbf{y}_{AB}$  is equal to:

$$\begin{aligned}
Var(\mathbf{y}_{AB}) &= Var\left(\mathbf{z}_{AB_k}^{*(A)} \boldsymbol{\beta}_{c_k}^{*(A)} + \mathbf{z}_{AB_{\neq k}}^{*(A)} \boldsymbol{\beta}_{c_{\neq k}}^{*(A)} + \mathbf{z}_{AB}^{*(B)} \boldsymbol{\beta}_c^{*(B)} + \mathbf{e}_{AB}\right) \\
&= \left(\mathbf{z}_{AB_k}^{*(A)} \mathbf{z}_{AB_k}^{*(A)'} + \mathbf{z}_{AB_{\neq k}}^{*(A)} \mathbf{z}_{AB_{\neq k}}^{*(A)'}\right) \sigma_{\beta_c^{*(A)}}^2 + \mathbf{z}_{AB}^{*(B)} \mathbf{z}_{AB}^{*(B)'} \sigma_{\beta_c^{*(B)}}^2 + \mathbf{I} \sigma_{e_{AB}}^2,
\end{aligned}$$

with  $\sigma_{e_{AB}}^2$  being the residual variance of the crossbred performance trait, and assuming null covariances among all random effects.

Similarly, the variance of  $\widehat{\mathbf{y}}_{AB}^*$  is equal to:

$$Var(\widehat{\mathbf{y}}_{AB}^*) = \mathbf{z}_{AB_k}^{*(A)} \mathbf{z}_{AB_k}^{*(A)'} \sigma_{\beta_c^{*(A)}}^2 + Var(\boldsymbol{\varepsilon}_{AB_k}).$$

The unknown variance of  $\boldsymbol{\varepsilon}_{AB_k}$ ,  $Var(\boldsymbol{\varepsilon}_{AB_k})$ , can be derived as follows:

$$\begin{aligned}
Var(\boldsymbol{\varepsilon}_{AB_k}) &= Var(\widehat{\mathbf{y}}_{AB}^*) - \mathbf{z}_{AB_k}^{*(A)} \mathbf{z}_{AB_k}^{*(A)'} \sigma_{\beta_c^{*(A)}}^2 \\
&= Var\left(\mathbf{y}_{AB} - \mathbf{z}_{AB_{\neq k}}^{*(A)} \widehat{\boldsymbol{\beta}}_{c_{\neq k}}^{*(A)} - \mathbf{z}_{AB}^{*(B)} \widehat{\boldsymbol{\beta}}_c^{*(B)}\right) - \mathbf{z}_{AB_k}^{*(A)} \mathbf{z}_{AB_k}^{*(A)'} \sigma_{\beta_c^{*(A)}}^2 \\
&= Var(\mathbf{y}_{AB}) + Var\left(\mathbf{z}_{AB_{\neq k}}^{*(A)} \widehat{\boldsymbol{\beta}}_{c_{\neq k}}^{*(A)} + \mathbf{z}_{AB}^{*(B)} \widehat{\boldsymbol{\beta}}_c^{*(B)}\right) \\
&\quad - Cov\left(\mathbf{y}_{AB}, \mathbf{z}_{AB_{\neq k}}^{*(A)} \widehat{\boldsymbol{\beta}}_{c_{\neq k}}^{*(A)} + \mathbf{z}_{AB}^{*(B)} \widehat{\boldsymbol{\beta}}_c^{*(B)}\right) \\
&\quad - Cov\left(\mathbf{z}_{AB_{\neq k}}^{*(A)} \widehat{\boldsymbol{\beta}}_{c_{\neq k}}^{*(A)} + \mathbf{z}_{AB}^{*(B)} \widehat{\boldsymbol{\beta}}_c^{*(B)}, \mathbf{y}_{AB}\right) - \mathbf{z}_{AB_k}^{*(A)} \mathbf{z}_{AB_k}^{*(A)'} \sigma_{\beta_c^{*(A)}}^2 \\
&= Var(\mathbf{y}_{AB}) + Var\left(\mathbf{z}_{AB_{\neq k}}^{*(A)} \widehat{\boldsymbol{\beta}}_{c_{\neq k}}^{*(A)} + \mathbf{z}_{AB}^{*(B)} \widehat{\boldsymbol{\beta}}_c^{*(B)}\right) \\
&\quad - 2Cov\left(\begin{matrix} \mathbf{z}_{AB_k}^{*(A)} \boldsymbol{\beta}_{c_k}^{*(A)} + \mathbf{z}_{AB_{\neq k}}^{*(A)} \boldsymbol{\beta}_{c_{\neq k}}^{*(A)} + \mathbf{z}_{AB}^{*(B)} \boldsymbol{\beta}_c^{*(B)} \\ + \mathbf{e}_{AB}, \mathbf{z}_{AB_{\neq k}}^{*(A)} \widehat{\boldsymbol{\beta}}_{c_{\neq k}}^{*(A)} + \mathbf{z}_{AB}^{*(B)} \widehat{\boldsymbol{\beta}}_c^{*(B)} \end{matrix}\right) - \mathbf{z}_{AB_k}^{*(A)} \mathbf{z}_{AB_k}^{*(A)'} \sigma_{\beta_c^{*(A)}}^2
\end{aligned}$$

$$\begin{aligned}
&= \text{Var}(\mathbf{y}_{AB}) - \text{Var}\left(\mathbf{Z}_{AB\neq k}^{*(A)} \widehat{\boldsymbol{\beta}}_{c\neq k}^{*(A)} + \mathbf{Z}_{AB}^{*(B)} \widehat{\boldsymbol{\beta}}_c^{*(B)}\right) - \mathbf{z}_{ABk}^{*(A)} \mathbf{z}_{ABk}^{*(A)'} \sigma_{\beta_c}^{2*(A)} \\
&= \left(\mathbf{z}_{ABk}^{*(A)} \mathbf{z}_{ABk}^{*(A)'} + \mathbf{Z}_{AB\neq k}^{*(A)} \mathbf{Z}_{AB\neq k}^{*(A)'}\right) \sigma_{\beta_c}^{2*(A)} \\
&\quad + \mathbf{Z}_{AB}^{*(B)} \mathbf{Z}_{AB}^{*(B)'} \sigma_{\beta_c}^{2*(B)} + \mathbf{I} \sigma_{e_{AB}}^2 - \text{Var}\left(\mathbf{Z}_{AB\neq k}^{*(A)} \widehat{\boldsymbol{\beta}}_{c\neq k}^{*(A)}\right) \\
&\quad - \text{Var}\left(\mathbf{Z}_{AB}^{*(B)} \widehat{\boldsymbol{\beta}}_c^{*(B)}\right) - \mathbf{z}_{ABk}^{*(A)} \mathbf{z}_{ABk}^{*(A)'} \sigma_{\beta_c}^{2*(A)} \\
&= \mathbf{Z}_{AB\neq k}^{*(A)} \mathbf{Z}_{AB\neq k}^{*(A)'} \sigma_{\beta_c}^{2*(A)} \left(1 - r_{\beta_c}^{2*(A)}\right) + \mathbf{Z}_{AB}^{*(B)} \mathbf{Z}_{AB}^{*(B)'} \sigma_{\beta_c}^{2*(B)} \left(1 - r_{\beta_c}^{2*(B)}\right) + \mathbf{I} \sigma_{e_{AB}}^2 \\
&\approx \mathbf{I} \left( \frac{\sigma_{cA}^2}{2} \left(1 - r_{\beta_c}^{2*(A)}\right) + \frac{\sigma_{cB}^2}{2} \left(1 - r_{\beta_c}^{2*(B)}\right) + \sigma_{e_{AB}}^2 \right) \\
&\approx \mathbf{I} \left( \sigma_{P_{AB}}^2 - \frac{\sigma_{cA}^2}{2} r_{\beta_c}^{2*(A)} - \frac{\sigma_{cB}^2}{2} r_{\beta_c}^{2*(B)} \right),
\end{aligned}$$

where  $\sigma_{P_{AB}}^2$  is the phenotypic variance of the crossbred performance trait;  $r_{\beta_c}^{2*(B)}$  is the reliability of the estimated effects  $\widehat{\boldsymbol{\beta}}_c^{*(B)}$ ;

$$\begin{aligned}
&\text{Var}\left(\mathbf{Z}_{AB\neq k}^{*(A)} \widehat{\boldsymbol{\beta}}_{c\neq k}^{*(A)} + \mathbf{Z}_{AB}^{*(B)} \widehat{\boldsymbol{\beta}}_c^{*(B)}\right) \\
&= \text{Cov}\left(\mathbf{Z}_{AB\neq k}^{*(A)} \boldsymbol{\beta}_{c\neq k}^{*(A)} + \mathbf{Z}_{AB}^{*(B)} \boldsymbol{\beta}_c^{*(B)}, \mathbf{Z}_{AB\neq k}^{*(A)} \widehat{\boldsymbol{\beta}}_{c\neq k}^{*(A)} + \mathbf{Z}_{AB}^{*(B)} \widehat{\boldsymbol{\beta}}_c^{*(B)}\right); \\
&\text{Cov}\left(\mathbf{Z}_{ABk}^{*(A)} \boldsymbol{\beta}_{c\neq k}^{*(A)} + \mathbf{e}_{AB}, \mathbf{Z}_{AB\neq k}^{*(A)} \widehat{\boldsymbol{\beta}}_{c\neq k}^{*(A)} + \mathbf{Z}_{AB}^{*(B)} \widehat{\boldsymbol{\beta}}_c^{*(B)}\right) = \mathbf{0}.
\end{aligned}$$

The approximations  $\mathbf{Z}_{AB\neq k}^{*(A)} \mathbf{Z}_{AB\neq k}^{*(A)'} \sigma_{\beta_c}^{2*(A)} \approx \mathbf{I} \frac{\sigma_{cA}^2}{2}$  and  $\mathbf{Z}_{AB}^{*(B)} \mathbf{Z}_{AB}^{*(B)'} \sigma_{\beta_c}^{2*(B)} \approx \mathbf{I} \frac{\sigma_{cB}^2}{2}$  are performed

because unrelated animals were assumed and because a single independent locus explains a small amount of  $\sigma_{cA}^2$  and  $\sigma_{cB}^2$ .

Therefore, following the mixed model theory [17, 19], the prediction of  $\beta_{c_k}^{*(A)}$ ,  $\hat{\beta}_{c_k}^{*(A)}$ , is equal to:

$$\hat{\beta}_{c_k}^{*(A)} = \left( \mathbf{z}_{AB_k}^{*(A)'} \mathbf{z}_{AB_k}^{*(A)} \sigma_{\varepsilon_{AB}}^{-2} + \sigma_{\beta_c}^{-2} \right)^{-1} \sigma_{\varepsilon_{AB}}^{-2} \mathbf{z}_{AB_k}^{*(A)'} \widehat{\mathbf{y}}_{AB}^*,$$

$$\text{with } \sigma_{\varepsilon_{AB}}^2 = \sigma_{P_{AB}}^2 - \frac{\sigma_{c_A}^2}{2} r_{\beta_c}^{2(A)} - \frac{\sigma_{c_B}^2}{2} r_{\beta_c}^{2(B)}.$$

and, the reliability of  $\hat{\beta}_{c_k}^{*(A)}$  is equal to:

$$\begin{aligned} r_{\beta_c}^{*(A)} &= \frac{\text{Var}(\beta_{c_k}^{*(A)}) - \text{Var}(\hat{\beta}_{c_k}^{*(A)} - \beta_{c_k}^{*(A)})}{\text{Var}(\beta_{c_k}^{*(A)})} \\ &= \frac{\sigma_{\beta_c}^{2(A)} - \left( \mathbf{z}_{AB_k}^{*(A)'} \mathbf{z}_{AB_k}^{*(A)} \sigma_{\varepsilon_{AB}}^{-2} + \sigma_{\beta_c}^{-2} \right)^{-1}}{\sigma_{\beta_c}^{2(A)}} \\ &= \frac{\sigma_{\beta_c}^{2(A)} - \left( S_{ZZ,k}^{(A)} \sigma_{\varepsilon_{AB}}^{-2} + \sigma_{\beta_c}^{-2} \right)^{-1}}{\sigma_{\beta_c}^{2(A)}} \\ &= \frac{\sigma_{\beta_c}^{2(A)} - \left( \frac{N_{AB}}{2} \sigma_{\varepsilon_{AB}}^{-2} + \sigma_{\beta_c}^{-2} \right)^{-1}}{\sigma_{\beta_c}^{2(A)}} \\ &= \frac{\left( \frac{N_{AB}}{2} \sigma_{\varepsilon_{AB}}^{-2} + \sigma_{\beta_c}^{-2} \right) \sigma_{\beta_c}^{2(A)} - 1}{\left( \frac{N_{AB}}{2} \sigma_{\varepsilon_{AB}}^{-2} + \sigma_{\beta_c}^{-2} \right) \sigma_{\beta_c}^{2(A)}} \\ &= \frac{\frac{N_{AB}}{2} \sigma_{\varepsilon_{AB}}^{-2} \sigma_{\beta_c}^{2(A)}}{\frac{N_{AB}}{2} \sigma_{\varepsilon_{AB}}^{-2} \sigma_{\beta_c}^{2(A)} + 1} = \frac{N_{AB} \sigma_{\varepsilon_{AB}}^{-2} \sigma_{\beta_c}^{2(A)}}{N_{AB} \sigma_{\varepsilon_{AB}}^{-2} \sigma_{\beta_c}^{2(A)} + 2}, \end{aligned}$$

with  $S_{zz,k}^{(A)} = \frac{N_{AB}}{2}$  being the adjusted sum of squares for the  $k^{\text{th}}$  locus [12, 14].

Because  $r_{c_{a_i}}^2 = r_{\beta_c^{*(A)}}^2$ ,  $\sigma_{\varepsilon_{AB}}^2 = \left( \sigma_{P_{AB}}^2 - \frac{\sigma_{c_A}^2}{2} r_{\beta_c^{*(A)}}^2 - \frac{\sigma_{c_B}^2}{2} r_{\beta_c^{*(B)}}^2 \right)$ , and  $\sigma_{c_A}^2 = Me^{(A)} \sigma_{\beta_c^{*(A)}}^2$ , the

predicted reliability of the genomic estimated breeding values for the  $i^{\text{th}}$  selection candidate of breed A,  $r_{c_{a_i}}^2$ , is equal to:

$$\begin{aligned} r_{c_{a_i}}^2 &= \frac{N_{AB} \sigma_{\varepsilon_{AB}}^{-2} \sigma_{\beta_c^{*(A)}}^2}{N_{AB} \sigma_{\varepsilon_{AB}}^{-2} \sigma_{\beta_c^{*(A)}}^2 + 2} \\ &= \frac{N_{AB} \sigma_{c_A}^2}{N_{AB} \sigma_{c_A}^2 + 2Me^{(A)} \left( \sigma_{P_{AB}}^2 - \frac{\sigma_{c_A}^2}{2} r_{\beta_c^{*(A)}}^2 - \frac{\sigma_{c_B}^2}{2} r_{\beta_c^{*(B)}}^2 \right)} \\ &= \frac{N_{AB} h_{c_A}^2}{N_{AB} h_{c_A}^2 + 2Me^{(A)} \left( 1 - \frac{1}{2} h_{c_A}^2 r_{c_a}^2 - \frac{1}{2} h_{c_B}^2 r_{c_a}^2 \right)}, \end{aligned}$$

where  $h_{c_A}^2$  ( $h_{c_B}^2$ ) is the breed A (B) specific heritability of the crossbred performance.

By ignoring the term  $\left( -\frac{1}{2} h_{c_A}^2 r_{c_a}^2 - \frac{1}{2} h_{c_B}^2 r_{c_a}^2 \right)$  for small  $h_{c_A}^2$  and  $h_{c_B}^2$ , the prediction equation simplifies to:

$$r_{C\_BSAM\_without}^2 = \frac{N_{AB} h_{c_A}^2}{N_{AB} h_{c_A}^2 + 2Me^{(A)}}.$$
